# Supplementary material for: The Baladi Cattle are a genetic sieve for Indicine and African-taurine genomic loci with positive effects on adaptation to harsh Mediterranean environments
Source: Research Square preprint supplement (doi:10.21203/rs.3.rs-6981045/v1), 2025-07-21
Supplement: Supplementary file 1 [file 025ce7b70407cb6c3232f23c.docx]

**The Baladi Cattle are a genetic sieve for Indicine and African-taurine genomic loci with positive effects on adaptation to harsh Mediterranean environments**

**Supplement tables**

**Table S1.** Significant chromosomal regions (marker local deviation ≥ |0.25|), by location (regions sorted by ancestor are presented in Table S2). Anc, ancestor: IND, indicine; ET, European taurine; AT, African taurine; Re, region serial number within ancestor (Table S2); C, chromosome; Start, End, locations in bp of the first and the last marker of the region (ARS-UCD1.2 genome built); Length, length of the region in bp; Distance, distance in bp between the first marker of a region and the last markers of the previous region on the same chromosome: yellow background, negative distance marks an overlap between regions (i.e., the end of the previous region is downstream the start of the current region); Ms, number of markers in the region; Top D, maximum deviation in the region, positive or negative; T. Ms, number of markers with the top deviation.

| **Anc** | **Re** | **C** | **Start** | **End** | **Length** | **Distance** | **Ms** | **Top D** | **T. Ms** |
| --- | --- | --- | --- | --- | --- | --- | --- | --- | --- |
| ET | 1 | 1 | 15,553,080 | 15,951,798 | 398,719 |  | 36 | 0.266 | 6 |
| AT | 1 | 1 | 56,076,584 | 56,651,272 | 574,689 | 40,124,787 | 61 | 0.272 | 61 |
| AT | 2 | 1 | 61,672,660 | 63,885,906 | 2,213,247 | 5,021,389 | 153 | 0.357 | 3 |
| AT | 3 | 1 | 84,971,360 | 85,731,139 | 759,780 | 21,085,455 | 37 | 0.257 | 37 |
| IND | 1 | 1 | 147,862,996 | 149,355,679 | 1,492,684 | 62,131,858 | 91 | 0.312 | 24 |
| IND | 2 | 1 | 152,836,482 | 156,575,528 | 3,739,047 | 3,480,804 | 258 | 0.441 | 62 |
| IND | 3 | 2 | 2,089,626 | 3,176,841 | 1,087,216 |  | 64 | 0.283 | 4 |
| AT | 4 | 2 | 29,758,133 | 30,067,947 | 309,815 | 26,581,293 | 19 | 0.257 | 19 |
| AT | 5 | 2 | 31,284,994 | 31,984,675 | 699,682 | 1,217,048 | 45 | 0.300 | 2 |
| ET | 2 | 2 | 41,871,660 | 43,124,109 | 1,252,450 | 9,886,986 | 87 | -0.322 | 8 |
| AT | 6 | 2 | 48,703,727 | 50,279,672 | 1,575,946 | 5,579,619 | 121 | 0.286 | 71 |
| IND | 4 | 2 | 62,586,894 | 65,284,862 | 2,697,969 | 12,307,223 | 237 | 0.441 | 30 |
| ET | 3 | 2 | 62,622,363 | 65,284,862 | 2,662,500 | -2,662,498 | 232 | -0.322 | 30 |
| IND | 5 | 2 | 70,571,420 | 70,882,748 | 311,329 | 5,286,559 | 17 | 0.269 | 17 |
| IND | 6 | 2 | 104,825,157 | 107,932,404 | 3,107,248 | 33,942,410 | 200 | 0.283 | 49 |
| ET | 4 | 2 | 104,886,722 | 107,194,177 | 2,307,456 | -3,045,681 | 148 | -0.425 | 15 |
| IND | 7 | 2 | 118,957,388 | 119,039,435 | 82,048 | 11,763,212 | 9 | 0.269 | 4 |
| IND | 8 | 2 | 121,391,182 | 121,393,886 | 2,705 | 2,351,748 | 2 | 0.341 | 2 |
| ET | 5 | 2 | 121,391,182 | 121,393,886 | 2,705 | -2,703 | 2 | -0.292 | 2 |
| IND | 9 | 2 | 124,181,264 | 125,639,877 | 1,458,614 | 2,787,379 | 71 | 0.283 | 2 |
| IND | 10 | 2 | 128,544,006 | 129,771,693 | 1,227,688 | 2,904,130 | 68 | 0.312 | 8 |
| IND | 11 | 3 | 12,221,940 | 14,465,307 | 2,243,368 |  | 160 | 0.455 | 0 |
| ET | 6 | 3 | 12,570,277 | 16,400,926 | 3,830,650 | -1,895,029 | 245 | -0.351 | 57 |
| AT | 7 | 3 | 17,549,904 | 18,574,820 | 1,024,917 | 1,148,979 | 94 | 0.300 | 34 |
| IND | 12 | 3 | 50,979,540 | 52,808,856 | 1,829,317 | 32,404,721 | 97 | 0.326 | 18 |
| AT | 8 | 3 | 118,447,425 | 120,811,745 | 2,364,321 | 65,638,570 | 127 | 0.257 | 117 |
| ET | 7 | 4 | 8,788,322 | 14,201,402 | 5,413,081 |  | 286 | -0.366 | 39 |
| IND | 13 | 4 | 12,643,065 | 14,374,527 | 1,731,463 | -1,558,336 | 116 | 0.283 | 25 |
| ET | 8 | 4 | 27,587,323 | 27,698,255 | 110,933 | 13,212,797 | 11 | -0.263 | 11 |
| IND | 14 | 4 | 44,835,312 | 45,965,156 | 1,129,845 | 17,137,058 | 79 | 0.341 | 28 |
| ET | 9 | 4 | 44,835,312 | 46,389,181 | 1,553,870 | -1,129,843 | 103 | -0.292 | 43 |
| IND | 15 | 4 | 53,543,667 | 55,740,690 | 2,197,024 | 7,154,487 | 90 | 0.355 | 33 |
| ET | 10 | 4 | 54,724,637 | 55,740,690 | 1,016,054 | -1,016,052 | 55 | -0.307 | 33 |
| IND | 16 | 4 | 78,614,593 | 78,637,123 | 22,531 | 22,873,904 | 2 | 0.255 | 2 |
| IND | 17 | 4 | 103,260,223 | 103,485,582 | 225,360 | 24,623,101 | 32 | 0.269 | 31 |
| IND | 18 | 4 | 105,064,459 | 105,088,495 | 24,037 | 1,578,878 | 5 | 0.255 | 5 |
| ET | 11 | 4 | 119,015,338 | 119,814,992 | 799,655 | 13,926,844 | 47 | -0.292 | 44 |
| ET | 12 | 5 | 2,309,735 | 3,142,134 | 832,400 |  | 46 | 0.252 | 46 |
| IND | 19 | 5 | 70,127,326 | 71,041,333 | 914,008 | 66,985,193 | 70 | 0.312 | 25 |
| AT | 9 | 5 | 75,127,273 | 77,074,319 | 1,947,047 | 4,085,941 | 125 | 0.272 | 72 |
| AT | 10 | 6 | 53,763,861 | 54,870,099 | 1,106,239 |  | 69 | 0.272 | 6 |
| AT | 11 | 6 | 80,109,487 | 81,179,871 | 1,070,385 | 25,239,389 | 64 | 0.272 | 55 |
| IND | 20 | 6 | 89,097,644 | 92,202,639 | 3,104,996 | 7,917,774 | 236 | 0.298 | 63 |
| AT | 12 | 7 | 14,819,017 | 15,194,760 | 375,744 |  | 31 | 0.300 | 14 |
| ET | 13 | 7 | 38,708,301 | 51,747,295 | 13,038,995 | 23,513,542 | 454 | -0.351 | 2 |
| AT | 13 | 7 | 40,589,906 | 50,280,340 | 9,690,435 | -11,157,388 | 313 | 0.386 | 54 |
| AT | 14 | 7 | 67,660,783 | 68,106,196 | 445,414 | 17,380,444 | 51 | 0.286 | 29 |
| AT | 15 | 7 | 74,318,657 | 80,251,074 | 5,932,418 | 6,212,462 | 416 | 0.357 | 129 |
| IND | 21 | 7 | 77,017,218 | 78,628,665 | 1,611,448 | -3,233,855 | 105 | -0.259 | 105 |
| AT | 16 | 7 | 109,122,056 | 109,999,314 | 877,259 | 30,493,392 | 66 | 0.257 | 66 |
| AT | 17 | 8 | 8,626,516 | 8,692,280 | 65,765 |  | 7 | 0.257 | 7 |
| IND | 22 | 8 | 33,568,412 | 33,960,147 | 391,736 | 24,876,133 | 11 | 0.269 | 1 |
| ET | 14 | 9 | 10,794,461 | 11,229,787 | 435,327 |  | 45 | 0.252 | 42 |
| AT | 18 | 9 | 43,479,689 | 43,646,813 | 167,125 | 32,249,903 | 29 | 0.272 | 25 |
| ET | 15 | 9 | 93,211,812 | 94,077,190 | 865,379 | 49,565,000 | 69 | -0.366 | 37 |
| IND | 23 | 9 | 93,211,812 | 94,254,183 | 1,042,372 | -865,377 | 94 | 0.526 | 13 |
| ET | 16 | 9 | 104,226,633 | 104,279,417 | 52,785 | 9,972,451 | 5 | -0.322 | 5 |
| AT | 19 | 9 | 104,226,633 | 104,279,417 | 52,785 | -52,783 | 5 | 0.329 | 5 |
| ET | 17 | 10 | 29,439,720 | 33,127,265 | 3,687,546 |  | 149 | 0.340 | 8 |
| AT | 20 | 10 | 89,987,624 | 90,944,725 | 957,102 | 56,860,360 | 129 | 0.272 | 129 |
| AT | 21 | 11 | 32,465,658 | 35,045,255 | 2,579,598 |  | 145 | 0.300 | 47 |
| IND | 24 | 11 | 50,922,174 | 55,417,517 | 4,495,344 | 15,876,920 | 252 | 0.298 | 74 |
| ET | 18 | 11 | 55,451,953 | 56,086,435 | 634,483 | 34,437 | 66 | -0.292 | 29 |
| AT | 22 | 11 | 58,288,844 | 58,728,631 | 439,788 | 2,202,410 | 26 | 0.286 | 7 |
| IND | 25 | 11 | 61,050,785 | 61,810,984 | 760,200 | 2,322,155 | 34 | 0.283 | 2 |
| IND | 26 | 11 | 63,345,445 | 63,564,302 | 218,858 | 1,534,462 | 23 | 0.269 | 23 |
| ET | 19 | 11 | 77,078,511 | 80,425,011 | 3,346,501 | 13,514,210 | 190 | 0.325 | 13 |
| ET | 20 | 11 | 94,330,862 | 95,488,048 | 1,157,187 | 13,905,852 | 39 | -0.278 | 38 |
| ET | 21 | 12 | 16,359,443 | 18,267,618 | 1,908,176 |  | 140 | 0.266 | 41 |
| ET | 22 | 14 | 58,030,414 | 61,383,707 | 3,353,294 |  | 174 | 0.310 | 6 |
| ET | 23 | 15 | 70,773 | 6,524,003 | 6,453,231 |  | 371 | -0.366 | 113 |
| IND | 27 | 15 | 4,673,363 | 6,630,698 | 1,957,336 | -1,850,639 | 142 | 0.298 | 96 |
| ET | 24 | 15 | 9,301,669 | 12,166,565 | 2,864,897 | 2,670,972 | 186 | -0.322 | 15 |
| AT | 23 | 15 | 10,706,274 | 12,522,704 | 1,816,431 | -1,460,290 | 118 | 0.329 | 99 |
| AT | 24 | 15 | 80,721,985 | 83,864,395 | 3,142,411 | 68,199,282 | 198 | 0.286 | 75 |
| ET | 25 | 15 | 84,031,569 | 84,124,500 | 92,932 | 167,175 | 8 | -0.366 | 8 |
| AT | 25 | 16 | 28,071,735 | 29,730,687 | 1,658,953 |  | 131 | 0.314 | 32 |
| AT | 26 | 16 | 57,088,465 | 57,949,462 | 860,998 | 27,357,779 | 49 | 0.272 | 25 |
| ET | 26 | 17 | 37,679,446 | 40,493,382 | 2,813,937 |  | 234 | 0.310 | 27 |
| AT | 27 | 17 | 47,312,236 | 48,042,363 | 730,128 | 6,818,855 | 96 | 0.272 | 12 |
| IND | 28 | 17 | 50,099,253 | 50,858,698 | 759,446 | 2,056,891 | 116 | 0.283 | 7 |
| ET | 27 | 17 | 68,088,263 | 68,198,848 | 110,586 | 17,229,566 | 12 | 0.281 | 11 |
| AT | 28 | 18 | 9,308,342 | 9,355,337 | 46,996 |  | 4 | 0.257 | 4 |
| ET | 28 | 19 | 22,249,834 | 23,938,808 | 1,688,975 |  | 136 | -0.322 | 32 |
| AT | 29 | 20 | 31,890,580 | 37,163,846 | 5,273,267 |  | 243 | 0.372 | 23 |
| ET | 29 | 20 | 33,275,529 | 37,514,982 | 4,239,454 | -3,888,316 | 202 | -0.292 | 22 |
| ET | 30 | 21 | 53,194,795 | 53,623,462 | 428,668 |  | 30 | 0.252 | 30 |
| AT | 30 | 21 | 59,302,243 | 62,942,584 | 3,640,342 | 5,678,782 | 344 | 0.386 | 35 |
| ET | 31 | 22 | 10,968,793 | 14,342,721 | 3,373,929 |  | 241 | 0.296 | 71 |
| ET | 32 | 23 | 21,532,793 | 21,592,388 | 59,596 |  | 3 | -0.366 | 3 |
| IND | 29 | 23 | 22,140,098 | 30,649,506 | 8,509,409 | 547,711 | 978 | 0.398 | 24 |
| ET | 33 | 23 | 24,794,179 | 31,123,096 | 6,328,918 | -5,855,326 | 728 | -0.366 | 123 |
| AT | 31 | 24 | 43,293,164 | 44,501,286 | 1,208,123 |  | 55 | 0.257 | 37 |
| IND | 30 | 26 | 109,933 | 1,326,699 | 1,216,767 |  | 40 | 0.255 | 40 |
| ET | 34 | 26 | 5,826,495 | 8,093,821 | 2,267,327 | 4,499,797 | 203 | 0.266 | 41 |
| ET | 35 | 26 | 25,201,152 | 26,169,541 | 968,390 | 17,107,332 | 94 | 0.281 | 5 |
| ET | 36 | 26 | 39,245,239 | 39,659,515 | 414,277 | 13,075,699 | 55 | 0.266 | 40 |
| ET | 37 | 26 | 42,978,887 | 44,238,502 | 1,259,616 | 3,319,373 | 151 | 0.296 | 51 |
| ET | 38 | 26 | 46,900,872 | 50,558,999 | 3,658,128 | 2,662,371 | 254 | 0.266 | 52 |
| AT | 32 | 27 | 187,811 | 576,973 | 389,163 |  | 18 | 0.272 | 18 |
| AT | 33 | 27 | 3,856,104 | 5,454,062 | 1,597,959 | 3,279,132 | 112 | 0.357 | 34 |
| ET | 39 | 27 | 4,452,647 | 5,106,935 | 654,289 | -1,001,414 | 41 | -0.278 | 28 |
| ET | 40 | 29 | 32,506,809 | 33,864,919 | 1,358,111 |  | 108 | 0.325 | 15 |

**Table S2.** Significant chromosomal regions (marker Local deviation ≥ |0.25|), by ancestor (marker local deviations sorted by location are presented in Table S1). Anc, ancestor: IND, indicine; ET, European taurine; AT, African taurine; Re, region serial number within ancestor (Table S1); C, chromosome; Start, End, locations in bp of the first and the last marker of the region (ARS-UCD1.2 genome built); Length, length of the region in bp; Distance, distance in bp between the first marker of a region and the last markers of the previous region on the same chromosome; Ms, number of markers in the region; Top D, maximum deviation in the region, positive or negative; T. Ms, number of markers with the top deviation.

| **Anc** | **Re** | **C** | **Start** | **End** | **Length** | **Distance** | **Ms** | **Top D** | **T. Ms** |
| --- | --- | --- | --- | --- | --- | --- | --- | --- | --- |
| IND | 1 | 1 | 147,862,996 | 149,355,679 | 1,492,684 |  | 91 | 0.312 | 24 |
| IND | 2 | 1 | 152,836,482 | 156,575,528 | 3,739,047 | 3,480,804 | 258 | 0.441 | 62 |
| IND | 3 | 2 | 2,089,626 | 3,176,841 | 1,087,216 |  | 64 | 0.283 | 4 |
| IND | 4 | 2 | 62,586,894 | 65,284,862 | 2,697,969 | 59,410,054 | 237 | 0.441 | 30 |
| IND | 5 | 2 | 70,571,420 | 70,882,748 | 311,329 |  | 17 | 0.269 | 17 |
| IND | 6 | 2 | 104,825,157 | 107,932,404 | 3,107,248 | 33,942,410 | 200 | 0.283 | 49 |
| IND | 7 | 2 | 118,957,388 | 119,039,435 | 82,048 | 11,024,985 | 9 | 0.269 | 4 |
| IND | 8 | 2 | 121,391,182 | 121,393,886 | 2,705 | 2,351,748 | 2 | 0.341 | 2 |
| IND | 9 | 2 | 124,181,264 | 125,639,877 | 1,458,614 |  | 71 | 0.283 | 2 |
| IND | 10 | 2 | 128,544,006 | 129,771,693 | 1,227,688 | 2,904,130 | 68 | 0.312 | 8 |
| IND | 11 | 3 | 12,221,940 | 14,465,307 | 2,243,368 |  | 160 | 0.455 | 0 |
| IND | 12 | 3 | 50,979,540 | 52,808,856 | 1,829,317 | 36,514,234 | 97 | 0.326 | 18 |
| IND | 13 | 4 | 12,643,065 | 14,374,527 | 1,731,463 |  | 116 | 0.283 | 25 |
| IND | 14 | 4 | 44,835,312 | 45,965,156 | 1,129,845 | 30,460,786 | 79 | 0.341 | 28 |
| IND | 15 | 4 | 53,543,667 | 55,740,690 | 2,197,024 | 7,578,512 | 90 | 0.355 | 33 |
| IND | 16 | 4 | 78,614,593 | 78,637,123 | 22,531 | 22,873,904 | 2 | 0.255 | 2 |
| IND | 17 | 4 | 103,260,223 | 103,485,582 | 225,360 |  | 32 | 0.269 | 31 |
| IND | 18 | 4 | 105,064,459 | 105,088,495 | 24,037 | 1,578,878 | 5 | 0.255 | 5 |
| IND | 19 | 5 | 70,127,326 | 71,041,333 | 914,008 |  | 70 | 0.312 | 25 |
| IND | 20 | 6 | 89,097,644 | 92,202,639 | 3,104,996 |  | 236 | 0.298 | 63 |
| IND | 21 | 7 | 77,017,218 | 78,628,665 | 1,611,448 |  | 105 | -0.259 | 105 |
| IND | 22 | 8 | 33,568,412 | 33,960,147 | 391,736 |  | 11 | 0.269 | 1 |
| IND | 23 | 9 | 93,211,812 | 94,254,183 | 1,042,372 |  | 94 | 0.526 | 13 |
| IND | 24 | 11 | 50,922,174 | 55,417,517 | 4,495,344 |  | 252 | 0.298 | 74 |
| IND | 25 | 11 | 61,050,785 | 61,810,984 | 760,200 |  | 34 | 0.283 | 2 |
| IND | 26 | 11 | 63,345,445 | 63,564,302 | 218,858 | 1,534,462 | 23 | 0.269 | 23 |
| IND | 27 | 15 | 4,673,363 | 6,630,698 | 1,957,336 |  | 142 | 0.298 | 96 |
| IND | 28 | 17 | 50,099,253 | 50,858,698 | 759,446 |  | 116 | 0.283 | 7 |
| IND | 29 | 23 | 22,140,098 | 30,649,506 | 8,509,409 |  | 978 | 0.398 | 24 |
| IND | 30 | 26 | 109,933 | 1,326,699 | 1,216,767 |  | 40 | 0.255 | 40 |
| ET | 1 | 1 | 15,553,080 | 15,951,798 | 398,719 |  | 36 | 0.266 | 6 |
| ET | 2 | 2 | 41,871,660 | 43,124,109 | 1,252,450 |  | 87 | -0.322 | 8 |
| ET | 3 | 2 | 62,622,363 | 65,284,862 | 2,662,500 | 19,498,255 | 232 | -0.322 | 30 |
| ET | 4 | 2 | 104,886,722 | 107,194,177 | 2,307,456 | 39,601,861 | 148 | -0.425 | 15 |
| ET | 5 | 2 | 121,391,182 | 121,393,886 | 2,705 | 14,197,006 | 2 | -0.292 | 2 |
| ET | 6 | 3 | 12,570,277 | 16,400,926 | 3,830,650 |  | 245 | -0.351 | 57 |
| ET | 7 | 4 | 8,788,322 | 14,201,402 | 5,413,081 |  | 286 | -0.366 | 39 |
| ET | 8 | 4 | 27,587,323 | 27,698,255 | 110,933 | 13,385,922 | 11 | -0.263 | 11 |
| ET | 9 | 4 | 44,835,312 | 46,389,181 | 1,553,870 | 17,137,058 | 103 | -0.292 | 43 |
| ET | 10 | 4 | 54,724,637 | 55,740,690 | 1,016,054 | 8,335,457 | 55 | -0.307 | 33 |
| ET | 11 | 4 | 119,015,338 | 119,814,992 | 799,655 | 63,274,649 | 47 | -0.292 | 44 |
| ET | 12 | 5 | 2,309,735 | 3,142,134 | 832,400 |  | 46 | 0.252 | 46 |
| ET | 13 | 7 | 38,708,301 | 51,747,295 | 13,038,995 |  | 454 | -0.351 | 2 |
| ET | 14 | 9 | 10,794,461 | 11,229,787 | 435,327 |  | 45 | 0.252 | 42 |
| ET | 15 | 9 | 93,211,812 | 94,077,190 | 865,379 | 81,982,026 | 69 | -0.366 | 37 |
| ET | 16 | 9 | 104,226,633 | 104,279,417 | 52,785 | 10,149,444 | 5 | -0.322 | 5 |
| ET | 17 | 10 | 29,439,720 | 33,127,265 | 3,687,546 |  | 149 | 0.340 | 8 |
| ET | 18 | 11 | 55,451,953 | 56,086,435 | 634,483 |  | 66 | -0.292 | 29 |
| ET | 19 | 11 | 77,078,511 | 80,425,011 | 3,346,501 | 20,992,077 | 190 | 0.325 | 13 |
| ET | 20 | 11 | 94,330,862 | 95,488,048 | 1,157,187 | 13,905,852 | 39 | -0.278 | 38 |
| ET | 21 | 12 | 16,359,443 | 18,267,618 | 1,908,176 |  | 140 | 0.266 | 41 |
| ET | 22 | 14 | 58,030,414 | 61,383,707 | 3,353,294 |  | 174 | 0.310 | 6 |
| ET | 23 | 15 | 70,773 | 6,524,003 | 6,453,231 |  | 371 | -0.366 | 113 |
| ET | 24 | 15 | 9,301,669 | 12,166,565 | 2,864,897 | 2,777,667 | 186 | -0.322 | 15 |
| ET | 25 | 15 | 84,031,569 | 84,124,500 | 92,932 | 71,865,005 | 8 | -0.366 | 8 |
| ET | 26 | 17 | 37,679,446 | 40,493,382 | 2,813,937 |  | 234 | 0.310 | 27 |
| ET | 27 | 17 | 68,088,263 | 68,198,848 | 110,586 | 27,594,882 | 12 | 0.281 | 11 |
| ET | 28 | 19 | 22,249,834 | 23,938,808 | 1,688,975 |  | 136 | -0.322 | 32 |
| ET | 29 | 20 | 33,275,529 | 37,514,982 | 4,239,454 |  | 202 | -0.292 | 22 |
| ET | 30 | 21 | 53,194,795 | 53,623,462 | 428,668 |  | 30 | 0.252 | 30 |
| ET | 31 | 22 | 10,968,793 | 14,342,721 | 3,373,929 |  | 241 | 0.296 | 71 |
| ET | 32 | 23 | 21,532,793 | 21,592,388 | 59,596 |  | 3 | -0.366 | 3 |
| ET | 33 | 23 | 24,794,179 | 31,123,096 | 6,328,918 | 3,201,792 | 728 | -0.366 | 123 |
| ET | 34 | 26 | 5,826,495 | 8,093,821 | 2,267,327 |  | 203 | 0.266 | 41 |
| ET | 35 | 26 | 25,201,152 | 26,169,541 | 968,390 | 17,107,332 | 94 | 0.281 | 5 |
| ET | 36 | 26 | 39,245,239 | 39,659,515 | 414,277 | 13,075,699 | 55 | 0.266 | 40 |
| ET | 37 | 26 | 42,978,887 | 44,238,502 | 1,259,616 | 3,319,373 | 151 | 0.296 | 51 |
| ET | 38 | 26 | 46,900,872 | 50,558,999 | 3,658,128 | 2,662,371 | 254 | 0.266 | 52 |
| ET | 39 | 27 | 4,452,647 | 5,106,935 | 654,289 |  | 41 | -0.278 | 28 |
| ET | 40 | 29 | 32,506,809 | 33,864,919 | 1,358,111 |  | 108 | 0.325 | 15 |
| AT | 1 | 1 | 56,076,584 | 56,651,272 | 574,689 |  | 61 | 0.272 | 61 |
| AT | 2 | 1 | 61,672,660 | 63,885,906 | 2,213,247 | 5,021,389 | 153 | 0.357 | 3 |
| AT | 3 | 1 | 84,971,360 | 85,731,139 | 759,780 | 21,085,455 | 37 | 0.257 | 37 |
| AT | 4 | 2 | 29,758,133 | 30,067,947 | 309,815 |  | 19 | 0.257 | 19 |
| AT | 5 | 2 | 31,284,994 | 31,984,675 | 699,682 | 1,217,048 | 45 | 0.300 | 2 |
| AT | 6 | 2 | 48,703,727 | 50,279,672 | 1,575,946 | 16,719,053 | 121 | 0.286 | 71 |
| AT | 7 | 3 | 17,549,904 | 18,574,820 | 1,024,917 |  | 94 | 0.300 | 34 |
| AT | 8 | 3 | 118,447,425 | 120,811,745 | 2,364,321 | 99,872,606 | 127 | 0.257 | 117 |
| AT | 9 | 5 | 75,127,273 | 77,074,319 | 1,947,047 |  | 125 | 0.272 | 72 |
| AT | 10 | 6 | 53,763,861 | 54,870,099 | 1,106,239 |  | 69 | 0.272 | 6 |
| AT | 11 | 6 | 80,109,487 | 81,179,871 | 1,070,385 | 25,239,389 | 64 | 0.272 | 55 |
| AT | 12 | 7 | 14,819,017 | 15,194,760 | 375,744 |  | 31 | 0.300 | 14 |
| AT | 13 | 7 | 40,589,906 | 50,280,340 | 9,690,435 | 25,395,147 | 313 | 0.386 | 54 |
| AT | 14 | 7 | 67,660,783 | 68,106,196 | 445,414 | 17,380,444 | 51 | 0.286 | 29 |
| AT | 15 | 7 | 74,318,657 | 80,251,074 | 5,932,418 | 6,212,462 | 416 | 0.357 | 129 |
| AT | 16 | 7 | 109,122,056 | 109,999,314 | 877,259 | 28,870,983 | 66 | 0.257 | 66 |
| AT | 17 | 8 | 8,626,516 | 8,692,280 | 65,765 |  | 7 | 0.257 | 7 |
| AT | 18 | 9 | 43,479,689 | 43,646,813 | 167,125 |  | 29 | 0.272 | 25 |
| AT | 19 | 9 | 104,226,633 | 104,279,417 | 52,785 | 60,579,821 | 5 | 0.329 | 5 |
| AT | 20 | 10 | 89,987,624 | 90,944,725 | 957,102 |  | 129 | 0.272 | 129 |
| AT | 21 | 11 | 32,465,658 | 35,045,255 | 2,579,598 |  | 145 | 0.300 | 47 |
| AT | 22 | 11 | 58,288,844 | 58,728,631 | 439,788 | 23,243,590 | 26 | 0.286 | 7 |
| AT | 23 | 15 | 10,706,274 | 12,522,704 | 1,816,431 |  | 118 | 0.329 | 99 |
| AT | 24 | 15 | 80,721,985 | 83,864,395 | 3,142,411 | 68,199,282 | 198 | 0.286 | 75 |
| AT | 25 | 16 | 28,071,735 | 29,730,687 | 1,658,953 |  | 131 | 0.314 | 32 |
| AT | 26 | 16 | 57,088,465 | 57,949,462 | 860,998 | 27,357,779 | 49 | 0.272 | 25 |
| AT | 27 | 17 | 47,312,236 | 48,042,363 | 730,128 |  | 96 | 0.272 | 12 |
| AT | 28 | 18 | 9,308,342 | 9,355,337 | 46,996 |  | 4 | 0.257 | 4 |
| AT | 29 | 20 | 31,890,580 | 37,163,846 | 5,273,267 |  | 243 | 0.372 | 23 |
| AT | 30 | 21 | 59,302,243 | 62,942,584 | 3,640,342 |  | 344 | 0.386 | 35 |
| AT | 31 | 24 | 43,293,164 | 44,501,286 | 1,208,123 |  | 55 | 0.257 | 37 |
| AT | 32 | 27 | 187,811 | 576,973 | 389,163 |  | 18 | 0.272 | 18 |
| AT | 33 | 27 | 3,856,104 | 5,454,062 | 1,597,959 | 3,279,132 | 112 | 0.357 | 34 |

**Additional Excel Table Files**

WS, Worksheet; Ancestors: IND, Indicus; ET, European taurus; AT, African taurus; Lines 1:4, summery values: count, average, minimum, maximum; Sig. region no., the number of the significant region within ancestor (Table S2).

**Additional Excel Table S1: ‘Baladi SNP and Genes 2.xlsx’**

**WS ‘Genes in region’.** All genes found in the significant regions (including genes without any SNP tested in the present study). Anc, ancestor: red ET, negative ET deviation (Top D < 0, column I, below); Re, number of the significant region within ancestor (Table S2); Chr, chromosome; Start, End, location of the start and end SNPs; Length, bps between the first and the last SNPs; Distance, bps between the first SNP and the last SNP of the previous region on the same chromosome: negative and colored distances, overlapping regions (the region start before the end of the previous region); SNPs, number of SNPs in the region; Top D, the larger deviation; T. SNPs, number of SNPs with the larger deviation; Genes, genes found in the region: bolded, genes with SNPs tested in the present study (WSs ‘IND’ to ‘NR SNPs’).

**WS ‘NR genes’ list’.** Non-redundant lists of genes in all ancestors. SNPs, number of SNPs tested in the gene; DAVID, number of categories the gene was found in by the DAVID analysis (Additional File ‘Baladi bioinformatics 2.xlsx’, WAS ‘All’); NR All, a non-redundant list of genes found in all ancestors combined. Columns M:S, genes’ sharing among ancestors.

**WSs ‘IND SNPs’, ‘ET SNPs’, ‘AT SNPs’.** SNPs and genes found by the BEDTools software [Quinlan and Hall, 2010] in the significant regions of the 3 ancestors, sorted by genomic location (ARS-UCD1.2 genome built). Chr, chromosome; bp, location of the SNP in base pairs; Distance, bps from the previous SNP on the same chromosome’; SNP_gene, location of the SNP relative to the gene: Variant, codon variant; Gene, gene’ initials; Variant, coding alleles; Sig. region no. , the number of the significant region within ancestor.

**WS ‘NR SNPS’.** A combined non-redundant list of SNPs found in all ancestors. Columns Column A:H as in the previous 3 WSs; AA, alternative amino acids of the coding SNP; Feature, characteristics of amino acid 1 (AA1) and 2 (AA2); Sig. region no., the number of the significant region within ancestor; Anc unique, a SNP found in one ancestor only; Shared, the SNP was found in more than one ancestor.

**WS ‘Region Overlap’.** Overlap of significant regions among the ancestors. Anc, ancestor: red ET, negative deviation of ET; Re, number of a region within ancestor (Table S2); Start, End, Distance, as above; Shared, regions shared among ancestors presented in Lines 7:9; Anc unique, region unique to one ancestor; cells P1:T5, matrix of regions sharing.

**Additional Excel Table S2: ‘Baladi bioinformatics 2.xlsx’**

**WS ‘ALL’.** DAVID results. Categories found in the significant regions of all ancestors combined, sorted by FDR. Line 1, categories details; Category, GO terms and KEGG pathways, found in the significant regions of the ancestors Indicus (IND), European taurus (ET) and African taurus (AT), sorted by FDR; Count, number of genes in the category; PValue, p-value; FDR; False Discovery Rate [1]; Bolded, categories significant at FDR ≤ 0.05.

**WSs ‘IND’, ‘ET’, ‘AT’.** DAVID results. Legend as for WAS AT columns B:G.

**WS ‘NR lists’**

**Columns A:W.** Non-redundant list of all genes (col A:K) or only genes annotated in the regions significant at FDR ≤ 0.05 (col M:W), by ancestor. Total, total number of categories where a gene was found; Unique, the gene was found only in this ancestor; Shared, the gene was shared by more than one ancestor. Line 1, title of dataset; line 2, count of all genes; line 3, count of gene presented in at least 1 category; line 4, average number of categories where the gene was found; lines 5 and 6, minimum and maximum number of categories where the gene was found.

**Columns Y:Z.** Non-redundant list of categories found in the significant regions of all three ancestors pooled together.

**Supplement Figure S1.** Global admixture analyses assuming k = 4 ancestral populations. One column, one animal; Different colors, different ancestral contributions; Black lines separate different populations: Br, Brahman; Gi, Gir, Ne, Nellore; A, Angus; Ba, Baladi; BS, Brown Swiss; Ga, Galloway; SH, Scotch Highland; H, Holstein; SA, South Anatolian; N’d, N’dama; P, Pinzgauer; Si, Simmental; Tu, Turkish Gray; EA, East Anatolian; Ty, Tyrol Grey.


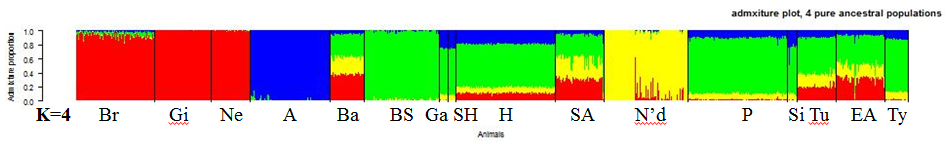


**Supplemental Figures File S1.** Marker Local admixture deviations of the three presumed ancestral components in each SNP plotted against chromosomal location of the SNP. IND, indicine; ET, European taurine; AT, African taurine.

**Appendix I.** **Estimation of n0 and n1, calculation of FDR and power by bins, for IND and AT**

We now apply the argument presented in the section "Estimating the proportion of IND or AT genome with positive effects on adaptation", to the data for the IND and AT ancestors. Appendix Figure 1, based on Figure 2 in the text, shows local admixture histogram for the Indicus ancestor. Right hand skewness is clearly evident, indicating positive selection for alleles derived from this ancestor. There is a single modal bin at Bin(>-0.050 to -0.025) (black bar), and the remaining bins are roughly symmetrically spaced about it. Therefore, for the IND ancestor this bin was taken as the axial bin of P0, and the origin (zero point) for assigning ordinal numbers to the bins to either side (Appendix Table 1). To continue the argument, Bins on the left-hand side of the axial bin (green bars) will be denoted N(‑i); bins on the right-hand side (red) will be denoted N(i).

**Appendix Figure 1**. Local admixture histogram for the IND ancestor. Black, modal bin; red, right-hand bins; green, left-hand bins (Appendix Table 1).

Appendix Figure 2, based on Figure 4 in the text, shows histogram of local admixture for the AT ancestor. Right hand skewness is again clearly evident, indicating positive selection for alleles derived from the AT ancestor. There is a very broad ragged mode extending across the central 7 bins, without a clear modal bin. However, there is a clear axis of symmetry centered on the single Bin(>-0.025 to 0). Hence, this bin (black) is taken as B(0), the central bin of the histogram. Green bar, left hand bins; red bar, right hand bins.

**Appendix Figure 2**. Local admixture histogram for AT ancestor. Black, modal (axial) bin; red, right-hand bins; green, left-hand bins (Appendix Table 1).

Appendix Table 1 shows the actual frequency distribution of local deviations for the two ancestors. Reading from top to bottom of Appendix Table 1 corresponds to reading from left to right on the histogram. Reading out in both directions from the modal bin (yellow) the approximate symmetry of the two sides of the histogram about the axial bin is evident.

**Appendix Table 1**. Frequency distribution of local deviations for the Indicine and AT ancestors, showing number of markers in each bin for each ancestor. Yellow highlight, the modal bin (black in Appendix Figures 1-2); green highlight, the left-hand bins; red highlight, the right-hand bins.

| **Bin boundaries** | **SNPs** | |
| --- | --- | --- |
| **IND** | **AT** |
| >-0.300 - -0.275 | 0 | 0 |
| >-0.275 - -0.250 | 105 | 0 |
| >-0.250 - -0.225 | 676 | 1,054 |
| >-0.225 - -0.200 | 3,469 | 1,788 |
| >-0.200 - -0.175 | 2,526 | 4,860 |
| >-0.175 - -0.150 | 4,934 | 6,857 |
| >-0.150 - -0.125 | 10,122 | 9,837 |
| >-0.125 - -0.100 | 11,688 | 6,958 |
| >-0.100 - -0.075 | 6,808 | 13,204 |
| >-0.075 - -0.050 | 14,658 | 11,916 |
| >-0.050 - -0.025 | 15,447 | 13,151 |
| >-0.025 - 0.000 | 15,182 | 6,711 |
| >0.000 - 0.025 | 6,870 | 13,251 |
| >0.025 - 0.050 | 12,334 | 13,587 |
| >0.050 - 0.075 | 11,142 | 11,007 |
| >0.075 - 0.100 | 9,189 | 5,857 |
| >0.100 - 0.125 | 4,229 | 9,210 |
| >0.125 - 0.150 | 6,712 | 7,535 |
| >0.150 - 0.175 | 5,466 | 5,935 |
| >0.175 - 0.200 | 4,699 | 2,915 |
| >0.200 - 0.225 | 1,762 | 2,473 |
| >0.225 - 0.250 | 2,263 | 2,199 |
| >0.250 - 0.275 | 965 | 1,510 |
| >0.275 - 0.300 | 865 | 325 |
| >0.300 - 0.325 | 127 | 346 |
| >0.325 - 0.350 | 365 | 790 |
| >0.350 - 0.375 | 394 | 353 |
| >0.375 - 0.400 | 370 | 89 |
| >0.400 - 0.425 | 77 | 0 |
| >0.425 - 0.450 | 176 | 0 |
| >0.450 - 0.475 | 57 | 0 |
| >0.475 - 0.500 | 4 | 0 |
| >0.500 - 0.525 | 24 | 0 |
| >0.525 - 0.550 | 13 | 0 |
| **Total** | 153,718 | 153,718 |
| **SD** | 0.116 | 0.117 |
| **Skewness** | 0.526 | 0.339 |
| **≤0** | 85,615 | 76,336 |

In Appendix Table 2 we apply this argument to the data for IND ancestor. Details in the legend to the table. In Appendix Table 3 we apply the argument to the data for the AT ancestor.

**Appendix Table 2.** IND. Estimation of n0 and n1 and calculation of FDR and power by bins. Details in the text below. Bold, values used in the text below.

| **Left hand (H0)** | | | | **Right hand (H1)** | | | | **FDR and Power** | | | | |
| --- | --- | --- | --- | --- | --- | --- | --- | --- | --- | --- | --- | --- |
| **Bin** | **N(-i)** | **n(-i)** | **n(-i)** | **Bin** | **N(i)** | **n(i)** | **n(i)** | **n1(i)** | **n1(i)** | **FDR(i)** | **FDR** | **Power(i)** |
| >-0.075 - -0.050 | -1 | 14,658 | 54,986 | >-0.025 - 0.000 | 1 | 15,182 | 83,285 | 524 | **28,299** | 0.965 | 0.660 | 1.000 |
| >-0.100 - -0.075 | -2 | 6,808 | 40,328 | >0.000 - 0.025 | 2 | 6,870 | 68,103 | 62 | 27,775 | 0.991 | 0.592 | 0.981 |
| >-0.125 - -0.100 | -3 | 11,688 | 33,520 | >0.025 - 0.050 | 3 | 12,334 | 61,233 | 646 | 27,713 | 0.948 | 0.547 | 0.979 |
| >-0.150 - -0.125 | -4 | 10,122 | 21,832 | >0.050 - 0.075 | 4 | 11,142 | 48,899 | 1,020 | 27,067 | 0.908 | 0.446 | 0.956 |
| >-0.175 - -0.150 | -5 | 4,934 | 11,710 | >0.075 - 0.100 | 5 | 9,189 | 37,757 | 4,255 | 26,047 | 0.537 | 0.310 | 0.920 |
| >-0.200 - -0.175 | -6 | 2,526 | 6,776 | >0.100 - 0.125 | 6 | 4,229 | 28,568 | 1,703 | 21,792 | 0.597 | 0.237 | 0.770 |
| >-0.225 - -0.200 | -7 | 3,469 | 4,250 | >0.125 - 0.150 | 7 | 6,712 | 24,339 | 3,243 | 20,089 | 0.517 | 0.175 | 0.710 |
| >-0.250 - -0.225 | **-8** | 676 | **781** | **>0.150 - 0.175** | **8** | 5,466 | **17,627** | 4,790 | **16,846** | 0.124 | **0.044** | **0.595** |
| >-0.275 - -0.250 | -9 | 105 | 105 | >0.175 - 0.200 | 9 | 4,699 | 12,161 | 4,594 | 12,056 | 0.022 | 0.009 | 0.426 |
|  | -10 |  |  | >0.200 - 0.225 | 10 | 1,762 | 7,462 | 1,762 | 7,462 | 0.000 | 0.000 | 0.264 |
|  | -11 |  |  | >0.225 - 0.250 | 11 | 2,263 | 5,700 | 2,263 | 5,700 | 0.000 | 0.000 | 0.201 |
|  | -12 |  |  | >0.250 - 0.275 | 12 | 965 | 3,437 | 965 | 3,437 | 0.000 | 0.000 | 0.121 |
|  | -13 |  |  | >0.275 - 0.300 | 13 | 865 | 2,472 | 865 | 2,472 | 0.000 | 0.000 | 0.087 |
|  | -14 |  |  | >0.30 - 0.325 | 14 | 127 | 1,607 | 127 | 1,607 | 0.000 | 0.000 | 0.057 |
|  | -15 |  |  | >0.325 - 0.350 | 15 | 365 | 1,480 | 365 | 1,480 | 0.000 | 0.000 | 0.052 |
|  | -16 |  |  | >0.35 0- 0.375 | 16 | 394 | 1,115 | 394 | 1,115 | 0.000 | 0.000 | 0.039 |
|  | -17 |  |  | >0.375 - 0.400 | 17 | 370 | 721 | 370 | 721 | 0.000 | 0.000 | 0.025 |
|  | -18 |  |  | >0.400 - 0.425 | 18 | 77 | 351 | 77 | 351 | 0.000 | 0.000 | 0.012 |
|  | -19 |  |  | >0.425 - 0.450 | 19 | 176 | 274 | 176 | 274 | 0.000 | 0.000 | 0.010 |
|  | -20 |  |  | >0.450 - 0.475 | 20 | 57 | 98 | 57 | 98 | 0.000 | 0.000 | 0.003 |
|  | -21 |  |  | >0.475 - 0.500 | 21 | 4 | 41 | 4 | 41 | 0.000 | 0.000 | 0.001 |
|  | -22 |  |  | >0.500 - 0.525 | 22 | 24 | 37 | 24 | 37 | 0.000 | 0.000 | 0.001 |
|  | -23 |  |  | >0.525 - 0.550 | 23 | 13 | 13 | 13 | 13 | 0.000 | 0.000 | 0.000 |

Left hand side of the table: N(-i), ordinal number of left-hand bin, counting down from the modal bin in Appendix Figure 1 and Appendix Table 1; n(-i) number of SNPs in N(-i); n(-i), cumulative number of SNPs summing from the most left hand bin in Figure 1 to the ith bin. n0 =n(-i), i = -1.

Right hand side (central part of the table): N(i), ordinal number of right-hand bin, counting down from the modal bin; n(i), number of SNPs in N(i); n(i), cumulative number of SNPs summing from the most right hand bin in Figure 1 to the ith bin. n1 = n1(i), i = 1.

Calculation of FDR and Power: n1(i), number of SNPs derived from IND ancestor in N(i) (= n(i) – (n(-i)). n1(i), cumulative number of SNPs derived from IND summing up from the most right-hand bin. FDR(i), proportion of false discoveries in bin N(i) = n(-i)/n(i);FDR, cumulative FDR(i) = (n(-i))/(n(i)) summing up from most right-hand bin; Power(i) = n1(i)/maximum value of n1(i), summing from most right-hand bin.

Examining Appendix Table 2, we see that any value > 0.15 for local admixture of IND genome will be significant at FDR = sum of bins N(-8 to end)/sum of bins N(8 to end) = 781/17,627 = 0.044. Power at this FDR = n1(8)/maximum(n1(i)) = 16,846/28,299 = 0.595.

Total number of markers under positive selection, n1(i) = 28,299. Total proportion of markers under positive selection = 28,299/153,718 = 0.184. Thus, almost 20% of Indicus genome is under positive selection.

**Appendix Table 3**. **AT**. **Estimation of n0 and n1 and calculation of FDR and power by bins.** Legend as Appendix Table 2. Modal (axial) bin was B(>-0.025 - 0.000)1; bolded, numbers used in, and results of, the FDR and power calculations below.

| **Left side (H0)** | | | | **Right side (H1)** | | | | **FDR and Power** | | | | |
| --- | --- | --- | --- | --- | --- | --- | --- | --- | --- | --- | --- | --- |
| **Bin** | **N(-i)** | **n(-i)** | **n(-i)** | **Bin** | **N(i)** | **n(i)** | **n(i)** | **n1(i)** | **n1(i)** | **FDR(i)** | **FDR** | **Power(i)** |
| >-0.050 - -0.025 | -1 | 13,151 | 69,625 | >0.000 - 0.025 | 1 | 13,251 | 77,382 | 100 | 7,757 | 0.992 | 0.900 | 0.783 |
| >-0.075 - -0.050 | -2 | 11,916 | 56,474 | >0.025 - 0.050 | 2 | 13,587 | 64,131 | 1,671 | 7,657 | 0.877 | 0.881 | 0.773 |
| >-0.100 - -0.075 | -3 | 13,204 | 44,558 | >0.050 - 0.075 | 3 | 11,007 | 50,544 | -2,197 | 5,986 | 1.200 | 0.882 | 0.604 |
| >-0.125 - -0.100 | -4 | 6,958 | 31,354 | >0.075 - 0.100 | 4 | 5,857 | 39,537 | -1,101 | 8,183 | 1.188 | 0.793 | 0.826 |
| >-0.150 - -0.125 | -5 | 9,837 | 24,396 | >0.100 - 0.125 | 5 | 9,210 | 33,680 | -627 | 9,284 | 1.068 | 0.724 | 0.937 |
| >-0.175 - -0.150 | -6 | 6,857 | 14,559 | >0.125 - 0.150 | 6 | 7,535 | 24,470 | 678 | **9,911** | 0.910 | 0.595 | 1.000 |
| >-0.200 - -0.175 | -7 | 4,860 | 7,702 | >0.150 - 0.175 | 7 | 5,935 | 16,935 | 1,075 | 9,233 | 0.819 | 0.455 | 0.932 |
| >-0.225 - -0.200 | -8 | 1,788 | 2,842 | >0.175 - 0.200 | 8 | 2,915 | 11,000 | 1,127 | 8,158 | 0.613 | 0.258 | 0.823 |
| >-0.250 - -0.225 | -9 | 1,054 | 1,054 | **>0.200 - 0.225** | 9 | 2,473 | 8,085 | 1,419 | 7,031 | 0.426 | **0.130** | **0.709** |
|  | -10 |  |  | **>0.225 - 0.250** | 10 | 2,199 | 5,612 | 2,199 | 5,612 | 0.000 | **0.000** | **0.566** |
|  | -11 |  |  | >0.250 - 0.275 | 11 | 1,510 | 3,413 | 1,510 | 3,413 | 0.000 | 0.000 | 0.344 |
|  | -12 |  |  | >0.275 - 0.300 | 12 | 325 | 1903 | 325 | 1,903 | 0.000 | 0.000 | 0.192 |
|  | -13 |  |  | >0.300 - 0.325 | 13 | 346 | 1578 | 346 | 1,578 | 0.000 | 0.000 | 0.159 |
|  | -14 |  |  | >0.325 - 0.350 | 14 | 790 | 1232 | 790 | 1,232 | 0.000 | 0.000 | 0.124 |
|  | -15 |  |  | >0.350 - 0.375 | 15 | 353 | 442 | 353 | 442 | 0.000 | 0.000 | 0.045 |
|  | -16 |  |  | >0.375 - 0.400 | 16 | 89 | 89 | 89 | 89 | 0.000 | 0.000 | 0.009 |

1This is not the modal bin, but it is the central bin of the proposed P0 distribution.

Thus, any value of local admixture > 0.225 will be significant at FDR = 0, Power will be 0.566.

If we go up one bin, to P > 0.2, we will be at FDR 0.13, and power 0.709.

Total number of markers under positive selection 9,911.

Total proportion of AT markers under positive selection, 9,911/153,718 = 0.064.

**Appendix II. Bioinformatics**

The bioinformatic investigation revealed that several candidate genes identified within significant genomic regions were functionally related to immune modulation, particularly inflammatory response and may contribute to traits of adaptive relevance (e. g., trypanotolerance).

For example, the IND region 29 and ET region 33 on chromosome 23 include the MHC (major histocompatibility complex), a major factor in immunity and thus the animal health. The complex includes all the BOLA genes (bovine leukocyte antigen) (Additional Excel Table S1: file ‘Baladi SNPs and genes 2.xlsx’, WS ‘Genes in regions’). Its genes are central to antigen presentation and immune recognition [2], underscoring this region’s involvement in adaptive immunity (additional genes in these regions are discussed below).

Key players in immune regulation and inflammation, potentially influencing an organism's resistance to parasitic infections such as Trypanosoma, are genes like IL2RB [3] (AT region 9 on chromosome 5, DAVID significant AT category molecular function), NLRP3 (ET region 13 with negative deviation and AT region 13 with positive deviation on chromosome 7; various ET and AT non-significant categories), SERPINA3 (AT region 30 on chromosome 21; various AT non-significant categories), and ELANE [4] (the same ET and AT regions 13 on chromosome 7 with opposite directions as NLRP3; 1 each ET and AT significant categories, and various non-significant ET and AT categories) [5–7].

There were two significant AT DAVID categories, including genes from chromosome 3 (IL3RA, CSF2RA [8]), chromosome 5 (IL2RB [3], CSF2RB [8]), chromosome 7 (ELANE [4]), and chromosome 20 (GHR [9], LIFR [10], OSMR [11]). Generally, all these genes play a crucial role in immunity, with potential effects on defense and survival.

Moreover, evidence of positive selection in IND-specific regions including genes that play a role in heat stress responses, suggests a strong contribution to adaptation to dry climates and high temperatures. On chromosome 23, the same regions of MHC (the above IND region 29 with positive deviation and ET region 33 with negative deviation), again appear to be of a prime interest, as it harbor four genes related to heat response: HSPA1A (2 each significant KEGG categories of IND and ET, and more non-significant categories of both ancestors), HSPA1L (same categories as HSPA1A), the GSTA1-5 genes (4 significant KEGG categories: 3 and 1 of IND and ET; various non-significant CC, BP, MF and KEGG categories of IND and ET), IER3 (few IND and ET non-significant categories), and NFKBIL1 (few IND and ET non-significant categories). Yet another heat response gene was SESN2 (IND region 9 on chromosome 2; few IND non-significant categories). These genes are responsible for cellular protection, oxidative stress management, and general resilience in stressful environmental conditions.

Heat shock proteins (HSPs) protect cells from stress by stabilizing proteins and refolding misfolded ones, crucial for adaptation to high temperatures [7]. The same above two interesting regions on chromosome 23 also appeared here: Glutathione S-transferases (GSTA; 3 and 1 significant KEGG categories of IND and ET, and more non-significant categories of both ancestors) help manage oxidative stress induced by high temperatures, contributing to cellular resilience in hot environments [12]; Immediate Early Response 3 (IER3; few IND and ET non-significant categories) is a stress-inducible gene, which responds to various stressors, including radiation, inflammation, and oxidative stress, through pathways crucial in modulating apoptosis and cell survival [13,14]; and NF-κB Inhibitor-like 1 (NFKBIL1; few IND and ET non-significant categories) is involved in regulating the NF-κB pathway, a key mediator of the immune and stress response [15,16]. Another heat shock protein, Sestrin 2 (SESN2; IND region 9 on chromosome 2, few IND non-significant categories), is involved in cellular response to stress and regulating oxidative stress, and helps in activating AMPK, which plays a role in cellular metabolism under stress conditions [17].

Thus, 7 numerous genes candidate by function to affect the adaptation of the Baladi, appeared in the same IND region 29 and ET region 33 on chromosome 23, making it a prime target for future exploration.

To conclude, the bioinformatics analysis highlights the significant contribution of both AT and IND genomic elements to the Baladi cattle’s resilience, at the expense of the ET components. AT genes component enhance immune response and parasitic resistance, and IND genes component fortify health, heat tolerance and stress adaptation, collectively enabling the breed to thrive in the challenging Mediterranean environment.

**References**

1. Benjamini Y, Hochberg Y. Controlling the false discovery rate: a practical and powerful approach to multiple testing. Journal of the Royal statistical society: series B (Methodological). 1995;57:289–300.

2. Pluta A, Taxis TM, Van Der Meer F, Shrestha S, Qualley D, Coussens P, et al. An immunoinformatics study reveals a new BoLA-DR-restricted CD4+ T cell epitopes on the Gag protein of bovine leukemia virus. Sci Rep. 2023;13:22356.

3. Fernandez IZ, Baxter RM, Garcia-Perez JE, Vendrame E, Ranganath T, Kong DS, et al. A novel human IL2RB mutation results in T and NK cell–driven immune dysregulation. Journal of Experimental Medicine. 2019;216:1255–67.

4. Li L, Zhang H, Wang X, Wang Z, Cui L, Xu Y, et al. Upregulated antimicrobial immune response mediated by neutrophils in the development from allergic rhinitis to asthma. Front Immunol. 2022;13:1026121.

5. Belaaouaj A, McCarthy R, Baumann M, Gao Z, Ley TJ, Abraham SN, et al. Mice lacking neutrophil elastase reveal impaired host defense against gram negative bacterial sepsis. Nat Med. 1998;4:615–8.

6. Boyman O, Sprent J. The role of interleukin-2 during homeostasis and activation of the immune system. Nat Rev Immunol. 2012;12:180–90.

7. Lamkanfi M, Dixit VM. Mechanisms and functions of inflammasomes. Cell. 2014;157:1013–22.

8. Côrte-Real BF, Arroyo Hornero R, Dyczko A, Hamad I, Kleinewietfeld M. Dissecting the role of CSF2RB expression in human regulatory T cells. Front Immunol. 2022;13:1005965.

9. Hattori N. Expression, regulation and biological actions of growth hormone (GH) and ghrelin in the immune system. Growth Hormone & IGF Research. 2009;19:187–97.

10. Ngara M, Siwo GH. Molecular relationships between SARS-CoV-2 Spike protein and LIFR, a pneumonia protective IL-6 family cytokine. 2021;

11. Araujo AM, Abaurrea A, Azcoaga P, López-Velazco JI, Manzano S, Rodriguez J, et al. Stromal oncostatin M cytokine promotes breast cancer progression by reprogramming the tumor microenvironment. J Clin Invest. 2022;132.

12. Zhu T, Wei B, Wang Y, Shang S. Glutathione S-Transferase Genes Involved in Response to Short-Term Heat Stress in Tetranychus urticae (Koch). Antioxidants. 2024;13:442.

13. Arlt A, Schäfer H. Role of the immediate early response 3 (IER3) gene in cellular stress response, inflammation and tumorigenesis. Eur J Cell Biol. 2011;90:545–52.

14. Ye J, Zhang Y, Cai Z, Jiang M, Li B, Chen G, et al. Increased expression of immediate early response gene 3 protein promotes aggressive progression and predicts poor prognosis in human bladder cancer. BMC Urol. 2018;18:1–6.

15. Sahin K. Modulation of NF-κB and Nrf2 pathways by lycopene supplementation in heat-stressed poultry. Worlds Poult Sci J. 2015;71:271–84.

16. Ghosh S, Karin M. Missing pieces in the NF-κB puzzle. Cell. 2002;109:S81–96.

17. Ro S-H, Semple I, Ho A, Park H-W, Lee JH. Sestrin2, a regulator of thermogenesis and mitohormesis in brown adipose tissue. Front Endocrinol (Lausanne). 2015;6:114.
